# Supplementary material
Source: publisher figshare collection journal article supplement (https://sage.figshare.com/ndownloader/files/21891465)
Supplement: Supplementary file 1 [file 21891465]

## Sheet: musvid_cors
	VC	Str	SSVC	Ac.G	Dist	Over	Clean	Solo	Strat	Tele	LP	SG	H.Bod	D.Mach	Fade	Scr.	Keys	Marsh	X332	Orch	T.miss	Color	Light	Alt	Mono	Dim	X2char	Cart	Digi	Spd	Reflx	ExNo	Long	DTRK	Zoom	Multi	Shak	Super	Mirr	X8mm	Make	Cross	TopL	Bowl	Spiky	Bald	Butch	Pixie	Crop
VC	1	-0.997277	-0.9999	0.237999	0.461154	0.483035	0.0762556	0.255383	0.208549	0.891988	0.279634	0.339532	0.266346	-0.69339	-0.0381953	0.0509523	-0.675657	0.156743	0.0509523	-0.138046	-0.0452948	0.0964985	0.131522	-0.0326181	-0.0187188	0.0335523	0.193953	0.253091	0.194292	0.107009	0.270929	-0.0457846	-0.160601	0.0251469	0.0678191	0.0667693	0.0747408	-0.129993	0.23721	0.0756367	-0.0321543	-0.098472	0.0371533	0.391596	0.216631	-0.0654159	-0.131172	-0.165448	0.0274787
Str	-0.997277	1	-0.879914	-0.0743897	-0.37967	-0.284667	-0.00905658	-0.0344697	-0.211446	-0.993884	-0.21916	-0.0880745	-0.0982386	0.533586	-0.025288	0.0842513	0.509114	-0.284062	0.0842513	-0.0436057	-0.187277	-0.173246	-0.23877	0.0819331	-0.101772	-0.0300687	-0.770424	-0.898463	0.065532	-0.127879	-0.166141	-0.152744	-0.215188	0.0472172	-0.0955485	0.208649	-0.323051	-0.0701393	-0.137687	-0.036357	0.100823	0.313345	0.104408	-0.0807626	-0.0862614	-0.0692706	-0.993884	-0.11462	-0.285223
SSVC	-0.9999	-0.879914	1	-0.288073	-0.376768	-0.457988	-0.0994005	-0.333194	-0.136595	-0.867752	-0.231458	-0.852338	-0.313268	0.558244	0.0701491	-0.156584	0.546207	-0.0321639	-0.156584	0.206404	0.170744	0	0.00745003	-0.0189722	0.101907	-0.0230615	-0.04135	-0.10016	-0.406331	-0.0475008	-0.265248	0.16078	0.302872	-0.0696808	-0.019404	-0.339652	0.154742	0.229516	-0.236878	-0.0770824	-0.0393739	-0.221393	-0.13901	-0.93469	-0.241137	0.137593	0.327474	0.278787	0.143973
Ac.G	0.237999	-0.0743897	-0.288073	1	-0.425158	0.163246	0.259287	0.114274	-0.0754211	0.197596	-0.444557	0.00993652	0.219498	-0.342772	0.0863549	-0.161331	-0.372556	-0.165428	0.231304	-0.00511362	0.315905	-0.03034	0.00395889	-0.017092	-0.119026	0.0521705	-0.142651	-0.0132702	-0.0562589	-0.199867	0.00392283	-0.109439	0.0935796	0.328554	0.0623615	0.113499	-0.223135	-0.019314	-0.0578942	0.0577305	-0.0532035	0.0689234	-0.167874	0.162577	-0.0462673	-0.143841	-0.0776103	-0.0403767	-0.262606
Dist	0.461154	-0.37967	-0.376768	-0.425158	1	-0.211601	-0.332814	0.22239	0.287547	0.12105	0.112143	0.164317	0.0483543	-0.512153	-0.370471	0.416565	-0.666681	0.103278	-0.216099	-0.43212	-0.327293	0.186359	0.304434	0.224622	0.127955	0.180036	-0.259876	0.559128	0.101296	0.130922	-0.236848	0.0977182	-0.400763	-0.117737	0.00638045	-0.0749688	0.182521	0.146892	0.149618	0.140578	0.240405	-0.0764922	0.105674	0.0694509	0.264446	-0.0736379	-0.122716	-0.436269	-0.0502783
Over	0.483035	-0.284667	-0.457988	0.163246	-0.211601	1	0.131223	0.332606	0.371316	0.1924	0.427772	0.0788628	0.343351	-0.504234	0.0424715	-0.0791611	-0.545103	0.23448	0.101111	-0.0763753	0.197261	-0.0111319	-0.154303	-0.081187	0.0227367	-0.153502	-0.0877155	-0.0911628	-0.0517757	0.0266258	0.294654	0.00645424	-0.0200931	-0.0042079	-0.032264	0.1438	0.00731091	-0.0299347	0.0107702	0.00914241	-0.124439	0.226904	-0.0547145	0.168197	-0.00914734	-0.15532	-0.173736	-0.128479	-0.210195
Clean	0.0762556	-0.00905658	-0.0994005	0.259287	-0.332814	0.131223	1	-0.144411	0.015858	0.311633	-0.0867102	0.145011	0.231576	-0.12641	0.116388	-0.23541	-0.23026	0.0278891	-0.0859398	0.0610021	0.059932	0.109936	-0.0490146	-0.0179229	0.0100029	-0.265648	0.0700895	0.102596	-0.182874	0.00046806	0.073944	-0.211211	0.109996	0.215779	0.0480508	0.268507	0.0464836	-0.0964716	-0.119549	0.0470895	-0.0465742	0.312138	-0.152336	0.132074	-0.12641	-0.0758149	-0.141972	-0.0994005	-0.0474658
Solo	0.255383	-0.0344697	-0.333194	0.114274	0.22239	0.332606	-0.144411	1	0.176582	0.220429	0.0802036	0.161859	0.270492	-0.525254	-0.0728153	-0.186678	-0.416269	0.470088	-0.250662	-0.175947	-0.0926741	-0.110222	-0.0560748	-0.010033	0.244089	-0.0623409	-0.218853	-0.0433446	-0.206709	-0.0349357	0.316943	-0.00768358	0.0553298	-0.0509866	-0.011289	0.138062	-0.00421183	0.0490876	0.0419469	0.0456982	0.0971246	1.2335e-08	0.0155469	0.137578	-0.136676	-0.0638279	-0.213759	-0.0144598	-0.107814
Strat	0.208549	-0.211446	-0.136595	-0.0754211	0.287547	0.371316	0.015858	0.176582	1	0.260924	-0.127687	0.145063	-0.142747	-0.50137	0.0924364	0.0801787	-0.593517	0.338189	-0.1414	-0.40107	0.0620073	-0.157378	-0.0643007	0.0928305	0.0588837	-0.0601608	-0.0281253	0.112337	-0.0488132	0.143397	-0.0838589	-0.0183753	-0.300702	-0.180567	0.150076	0.0766115	0.0840265	0.193019	0.0797836	-0.376419	-0.293736	-0.208034	0.0220239	0.117914	-0.00682231	-0.159223	0.0606912	-0.223038	-0.0757842
Tele	0.891988	-0.993884	-0.867752	0.197596	0.12105	0.1924	0.311633	0.220429	0.260924	1	0.159309	0.0335497	-0.150205	-0.894408	0.0696226	-0.092191	-0.398165	0.262427	0.0966779	0.113147	-0.858369	0.0708625	0.070411	-0.0794975	-0.0318937	0.243233	-0.746358	0.117751	-0.186395	-0.00486537	0.29224	-0.0776103	-0.944171	-0.139117	0.110902	0.0446574	0.281865	0.0934611	-0.0152828	0.0840774	-0.0518324	-0.897096	-0.231839	-0.224206	0.0378648	-0.903448	-0.0297279	0.0446574	0.0663324
LP	0.279634	-0.21916	-0.231458	-0.444557	0.112143	0.427772	-0.0867102	0.0802036	-0.127687	0.159309	1	-0.180582	-0.305112	-0.427167	0.0260434	-0.307394	-0.979331	0.486855	0.0715317	-0.0685208	-0.0991668	-0.0193315	0.115141	-0.126271	0.0807895	0.0754216	-0.0348017	-0.0935657	-0.149819	0.0659641	0.0345298	0.0243865	-0.307394	-0.0846395	0.123654	-0.145753	-0.0192149	0.0192149	0.0717317	0.386022	0.107793	0.0920883	0.0081517	0.0415655	0.120489	-0.120264	-0.0751722	0.12707	-0.0870602
SG	0.339532	-0.0880745	-0.852338	0.00993652	0.164317	0.0788628	0.145011	0.161859	0.145063	0.0335497	-0.180582	1	0.358729	-0.879282	-0.252575	0.169566	-0.8753	0.348603	-0.985129	-0.9775	-0.152679	-0.0865067	-0.225336	0.0449833	0.0189693	-0.307766	-0.72116	-0.742195	-0.122079	0.433547	-0.838406	0.120442	0.312717	0.296251	-0.101461	0.129477	0.0873077	0.00182824	-0.76456	0.189494	-0.159885	0.062899	-0.263511	0.2749	0.0473388	-0.224196	-0.801161	-0.187199	-0.162214
H.Bod	0.266346	-0.0982386	-0.313268	0.219498	0.0483543	0.343351	0.231576	0.270492	-0.142747	-0.150205	-0.305112	0.358729	1	-0.442882	-0.0805779	-0.110434	-0.209833	0.108856	-0.0137109	-0.0795204	0.290193	0.0992864	-0.100794	-0.1542	0.0845139	-0.164499	0.263161	-0.160047	-0.145607	-0.170736	0.37398	0.0076518	0.0720421	0.0617688	0.0226129	0.181224	0.00701848	0.093237	-0.296574	0.0115545	0.124264	0.012965	-0.333322	0.45278	-0.0494482	-0.147677	-0.311063	-0.0958283	-0.299402
D.Mach	-0.69339	0.533586	0.558244	-0.342772	-0.512153	-0.504234	-0.12641	-0.525254	-0.50137	-0.894408	-0.427167	-0.879282	-0.442882	1	0.248397	-0.143832	0.858641	-0.32313	-0.0624792	0.173717	0.175627	0.0135948	0.118542	0.0661192	-0.145085	-0.00787013	0.151558	-0.261804	0.18946	0.0628677	-0.424317	-0.0462673	0.0823962	-0.0633477	-0.0438728	-0.0309539	-0.132085	-0.00489839	0.145529	-0.0172492	0.0677367	-0.108537	0.125582	-0.328338	-0.086453	0.169897	0.196247	0.23428	0.225169
Fade	-0.0381953	-0.025288	0.0701491	0.0863549	-0.370471	0.0424715	0.116388	-0.0728153	0.0924364	0.0696226	0.0260434	-0.252575	-0.0805779	0.248397	1	-0.230722	0.23678	-0.0384352	0.343674	0.220746	0.232621	0.0163565	0.0490196	0.140258	-0.166818	-0.0826447	-0.962097	0.0265779	0.121857	0.0911124	-0.172802	-0.0482421	-0.230722	0.0734406	-0.0305691	0.0153365	-0.110874	0.207814	-0.302009	-0.234351	-0.130295	-0.286621	-0.0583448	0.000183684	-0.33861	0.0036234	0.161363	0.122385	0.101914
Scr.	0.0509523	0.0842513	-0.156584	-0.161331	0.416565	-0.0791611	-0.23541	-0.186678	0.0801787	-0.092191	-0.307394	0.169566	-0.110434	-0.143832	-0.230722	1	-0.217882	-0.224079	-0.154995	-0.257137	0.0050112	0.14707	0.183026	-0.00147942	0.0296839	0.156668	0.114137	0.0571175	0.146455	0.337986	0.0809453	0.0935796	-0.154995	0.0535808	0.096411	-0.313946	0.110473	-0.173009	0.11328	0.132001	0.187417	0.130867	0.454794	-0.0038108	0.148505	0.225129	0.0966779	-0.313946	-0.11552
Keys	-0.675657	0.509114	0.546207	-0.372556	-0.666681	-0.545103	-0.23026	-0.416269	-0.593517	-0.398165	-0.979331	-0.8753	-0.209833	0.858641	0.23678	-0.217882	1	-0.402411	-0.126996	0.194074	0.150085	0.0278036	-0.143314	-0.100908	-0.199662	0.00911992	0.00959429	-0.248675	0.108499	-0.117527	-0.15264	0.0539543	0.0301683	-0.0948989	-0.108008	-0.0599034	-0.224879	0.115079	-0.232252	-0.145764	-0.0658516	-0.213611	0.0350381	-0.180954	-0.170976	0.0748814	0.213422	0.296168	0.25189
Marsh	0.156743	-0.284062	-0.0321639	-0.165428	0.103278	0.23448	0.0278891	0.470088	0.338189	0.262427	0.486855	0.348603	0.108856	-0.32313	-0.0384352	-0.224079	-0.402411	1	-0.224079	-0.325716	-0.197569	-0.341361	-0.021888	0.0114297	-0.0695331	0.0902368	-0.796966	-0.924456	-0.317858	0.161176	-0.175041	0.278133	0.178684	0.119573	0.024692	0.125974	0.0399726	0.153653	-0.146583	-0.195811	-0.0920698	0.0541337	-0.134625	0.0881345	-0.16844	-0.146881	-0.161203	-0.0321639	-0.13874
X332	0.0509523	0.0842513	-0.156584	0.231304	-0.216099	0.101111	-0.0859398	-0.250662	-0.1414	0.0966779	0.0715317	-0.985129	-0.0137109	-0.0624792	0.343674	-0.154995	-0.126996	-0.224079	1	-0.0915263	0.276574	-0.0880424	0.117096	-0.192254	-0.0916987	0.0367014	-0.777939	-0.767832	-0.249217	-0.0889158	-0.95622	-0.413625	-0.154995	0.192059	0.0351509	-0.863512	-0.185921	0.0105435	-0.931075	-0.298173	-0.125548	0.130867	0.175767	-0.0038108	-0.233712	-0.106673	-0.092191	0.0630594	-0.0332428
Orch	-0.138046	-0.0436057	0.206404	-0.00511362	-0.43212	-0.0763753	0.0610021	-0.175947	-0.40107	0.113147	-0.0685208	-0.9775	-0.0795204	0.173717	0.220746	-0.257137	0.194074	-0.325716	-0.0915263	1	0.0511255	-0.132196	0.0511649	-0.0155858	0.0870336	-0.0131938	0.0150271	-0.901982	-0.0865789	-0.17568	0.20298	-0.00511362	0.136285	0.0766468	-0.0373288	0.00319125	-0.282672	-0.114369	-0.17972	-0.102549	0.0410995	-0.844545	-0.135684	-0.0410516	0.020782	-0.0837655	0.221885	0.143688	-0.0601215
T.miss	-0.0452948	-0.187277	0.170744	0.315905	-0.327293	0.197261	0.059932	-0.0926741	0.0620073	-0.858369	-0.0991668	-0.152679	0.290193	0.175627	0.232621	0.0050112	0.150085	-0.197569	0.276574	0.0511255	1	-0.0622333	0.0995123	-0.155387	-0.0984797	-0.16183	-0.00725944	0.135138	-0.114972	-0.0804446	-0.0599523	0.0166981	0.276574	-0.106201	-0.0246673	-0.435867	-0.0918779	-0.0339603	0.104966	-0.202436	0.00908863	0.125095	-0.0745973	0.0822888	-0.188324	0.0288538	-0.0437058	-0.300674	-0.0971235
Color	0.0964985	-0.173246	0	-0.03034	0.186359	-0.0111319	0.109936	-0.110222	-0.157378	0.0708625	-0.0193315	-0.0865067	0.0992864	0.0135948	0.0163565	0.14707	0.0278036	-0.341361	-0.0880424	-0.132196	-0.0622333	1	0.281027	0.34439	-0.0335156	0.0984686	0.137529	0.113949	-0.0224788	0.296837	-0.0339369	0	-0.206606	0.118499	-0.0668673	0.0380406	0.0775835	0.230946	0.11143	0.21653	0.0814676	0.0777527	0.0982176	0	0.0135948	0.115925	0.0708625	-0.152222	-0.0846974
Light	0.131522	-0.23877	0.00745003	0.00395889	0.304434	-0.154303	-0.0490146	-0.0560748	-0.0643007	0.070411	0.115141	-0.225336	-0.100794	0.118542	0.0490196	0.183026	-0.143314	-0.021888	0.117096	0.0511649	0.0995123	0.281027	1	0.17892	0.0435236	0.591034	-0.126782	-0.473229	0.180596	0.133606	-0.249524	-0.0900112	-0.242794	0.00567572	0.0869395	-0.185721	0.0599167	0.0325778	0.301529	-0.0285599	0.20463	-0.144571	0.0951319	-0.0570128	-0.0244678	0.0600065	-0.0772287	-0.109782	-0.0232753
Alt	-0.0326181	0.0819331	-0.0189722	-0.017092	0.224622	-0.081187	-0.0179229	-0.010033	0.0928305	-0.0794975	-0.126271	0.0449833	-0.1542	0.0661192	0.140258	-0.00147942	-0.100908	0.0114297	-0.192254	-0.0155858	-0.155387	0.34439	0.17892	1	0.0765184	0.11787	-0.019765	0.00897033	0.183888	0.333668	-0.105056	-0.0807476	-0.333768	-0.0869573	0.117854	0.393077	0.325946	0.287542	0.24619	0.219603	0.00381392	-0.105699	0.118478	0.168686	-0.075053	0.0855539	0.208557	-0.0589098	0.124964
Mono	-0.0187188	-0.101772	0.101907	-0.119026	0.127955	0.0227367	0.0100029	0.244089	0.0588837	-0.0318937	0.0807895	0.0189693	0.0845139	-0.145085	-0.166818	0.0296839	-0.199662	-0.0695331	-0.0916987	0.0870336	-0.0984797	-0.0335156	0.0435236	0.0765184	1	-0.00101339	-0.0431055	0.0992135	0.0167526	-0.067367	0.213287	0.00647134	-0.0916987	-0.156639	0.0361991	0.101907	0.355193	0.117139	-0.0788402	0.319444	-0.0293646	-0.131803	0.218021	-0.0293646	0.0509579	-0.038906	0.040515	-0.053095	-0.208175
Dim	0.0335523	-0.0300687	-0.0230615	0.0521705	0.180036	-0.153502	-0.265648	-0.0623409	-0.0601608	0.243233	0.0754216	-0.307766	-0.164499	-0.00787013	-0.0826447	0.156668	0.00911992	0.0902368	0.0367014	-0.0131938	-0.16183	0.0984686	0.591034	0.11787	-0.00101339	1	-0.0417314	-0.27279	0.194209	0.0753685	-0.21861	0.0216086	-0.197547	0.159781	0.0801479	-0.0611179	-0.173341	0.0624553	-0.0850737	-0.172647	0.104904	-0.447551	0.112803	-0.180574	-0.0894956	0.0884274	-0.0487314	-0.0611179	-0.0734882
X2char	0.193953	-0.770424	-0.04135	-0.142651	-0.259876	-0.0877155	0.0700895	-0.218853	-0.0281253	-0.746358	-0.0348017	-0.72116	0.263161	0.151558	-0.962097	0.114137	0.00959429	-0.796966	-0.777939	0.0150271	-0.00725944	0.137529	-0.126782	-0.019765	-0.0431055	-0.0417314	1	-0.69096	0.022815	0.290071	0.381767	0.0604139	0.114137	0.301023	-0.0915851	0.459455	0.058474	0.0799969	0.187323	-0.166717	0.197816	0.201715	0.475653	0.355742	-0.00473516	0.114175	0.173673	0.169106	0.439573
Cart	0.253091	-0.898463	-0.10016	-0.0132702	0.559128	-0.0911628	0.102596	-0.0433446	0.112337	0.117751	-0.0935657	-0.742195	-0.160047	-0.261804	0.0265779	0.0571175	-0.248675	-0.924456	-0.767832	-0.901982	0.135138	0.113949	-0.473229	0.00897033	0.0992135	-0.27279	-0.69096	1	-0.894328	-0.0849251	0.317978	0.132006	-0.767832	-0.186282	0.139985	0.0978732	0.0314055	-0.0314055	0.131688	0.104584	-0.0729653	0.146399	-0.0160864	-0.930068	0.0633805	-0.116465	0.332125	-0.10016	0.212924
Digi	0.194292	0.065532	-0.406331	-0.0562589	0.101296	-0.0517757	-0.182874	-0.206709	-0.0488132	-0.186395	-0.149819	-0.122079	-0.145607	0.18946	0.121857	0.146455	0.108499	-0.317858	-0.249217	-0.0865789	-0.114972	-0.0224788	0.180596	0.183888	0.0167526	0.194209	0.022815	-0.894328	1	0.38691	-0.0253417	0.0077858	-0.865767	-0.177006	-0.0114741	0.0145628	-0.17554	0.21964	0.251399	-0.0901452	-0.23472	0.0260082	0.131186	0.127312	0.328638	0.137993	0.122638	0.0881679	0.0683285
Spd	0.107009	-0.127879	-0.0475008	-0.199867	0.130922	0.0266258	0.00046806	-0.0349357	0.143397	-0.00486537	0.0659641	0.433547	-0.170736	0.0628677	0.0911124	0.337986	-0.117527	0.161176	-0.0889158	-0.17568	-0.0804446	0.296837	0.133606	0.333668	-0.067367	0.0753685	0.290071	-0.0849251	0.38691	1	-0.124896	-0.105208	-0.376517	0.0436051	0.203759	0.311347	0.29652	0.18572	0.343642	0.0789188	0.165552	0.114189	0.325187	-0.0207702	0.00239328	0.195288	0.160819	0.0361027	0.07655
Reflx	0.270929	-0.166141	-0.265248	0.00392283	-0.236848	0.294654	0.073944	0.316943	-0.0838589	0.29224	0.0345298	-0.838406	0.37398	-0.424317	-0.172802	0.0809453	-0.15264	-0.175041	-0.95622	0.20298	-0.0599523	-0.0339369	-0.249524	-0.105056	0.213287	-0.21861	0.381767	0.317978	-0.0253417	-0.124896	1	0.174785	0.506116	-0.109941	0.290522	0.131609	0.150294	-0.224362	-0.0289532	0.143053	-0.068099	-0.939077	-0.250583	0.0594638	0.241546	-0.0279282	-0.0434287	0.131609	-0.141822
ExNo	-0.0457846	-0.152744	0.16078	-0.109439	0.0977182	0.00645424	-0.211211	-0.00768358	-0.0183753	-0.0776103	0.0243865	0.120442	0.0076518	-0.0462673	-0.0482421	0.0935796	0.0539543	0.278133	-0.413625	-0.00511362	0.0166981	0	-0.0900112	-0.0807476	0.00647134	0.0216086	0.0604139	0.132006	0.0077858	-0.105208	0.174785	1	0.231304	0.0808827	0.0311019	-0.288073	0.144124	0.0422926	-0.179724	0.206382	0.0047096	0.402852	-0.0257746	-0.0532035	0.172852	0.143035	0.345811	0.0131519	0.0324315
Long	-0.160601	-0.215188	0.302872	0.0935796	-0.400763	-0.0200931	0.109996	0.0553298	-0.300702	-0.944171	-0.307394	0.312717	0.0720421	0.0823962	-0.230722	-0.154995	0.0301683	0.178684	-0.154995	0.136285	0.276574	-0.206606	-0.242794	-0.333768	-0.0916987	-0.197547	0.114137	-0.767832	-0.865767	-0.376517	0.506116	0.231304	1	0.121027	-0.430146	-0.156584	-0.0105435	-0.451239	-0.931075	-0.0149848	-0.125548	-0.916839	-0.230632	-0.286865	-0.338037	0.10202	-0.944171	0.0630594	-0.11552
DTRK	0.0251469	0.0472172	-0.0696808	0.328554	-0.117737	-0.0042079	0.215779	-0.0509866	-0.180567	-0.139117	-0.0846395	0.296251	0.0617688	-0.0633477	0.0734406	0.0535808	-0.0948989	0.119573	0.192059	0.0766468	-0.106201	0.118499	0.00567572	-0.0869573	-0.156639	0.159781	0.301023	-0.186282	-0.177006	0.0436051	-0.109941	0.0808827	0.121027	1	-0.215185	0.140659	-0.0448435	-0.0276409	-0.0951751	0.0354467	0.134144	0.225849	0.0167521	0.134144	0.054862	0.217199	-0.139117	0.012108	0.00427316
Zoom	0.0678191	-0.0955485	-0.019404	0.0623615	0.00638045	-0.032264	0.0480508	-0.011289	0.150076	0.110902	0.123654	-0.101461	0.0226129	-0.0438728	-0.0305691	0.096411	-0.108008	0.024692	0.0351509	-0.0373288	-0.0246673	-0.0668673	0.0869395	0.117854	0.0361991	0.0801479	-0.0915851	0.139985	-0.0114741	0.203759	0.290522	0.0311019	-0.430146	-0.215185	1	0.0587233	0.240501	0.0283683	0.00631182	0.0919416	-0.0483036	-0.181134	-0.161497	0.0348399	-0.0438728	-0.238908	0.0364013	-0.019404	-0.104969
Multi	0.0667693	0.208649	-0.339652	0.113499	-0.0749688	0.1438	0.268507	0.138062	0.0766115	0.0446574	-0.145753	0.129477	0.181224	-0.0309539	0.0153365	-0.313946	-0.0599034	0.125974	-0.863512	0.00319125	-0.435867	0.0380406	-0.185721	0.393077	0.101907	-0.0611179	0.459455	0.0978732	0.0145628	0.311347	0.131609	-0.288073	-0.156584	0.140659	0.0587233	1	0.235428	-0.0755185	0.171771	0.294068	-0.117732	-0.0469638	0.0371526	0.323648	-0.185027	0.178567	0.0446574	-0.07803	0.0523223
Shak	0.0747408	-0.323051	0.154742	-0.223135	0.182521	0.00731091	0.0464836	-0.00421183	0.0840265	0.281865	-0.0192149	0.0873077	0.00701848	-0.132085	-0.110874	0.110473	-0.224879	0.0399726	-0.185921	-0.282672	-0.0918779	0.0775835	0.0599167	0.325946	0.355193	-0.173341	0.058474	0.0314055	-0.17554	0.29652	0.150294	0.144124	-0.0105435	-0.0448435	0.240501	0.235428	1	0.192039	0.259357	0.383237	-0.0318226	0.0665115	0.186759	0.00950061	-0.0227239	-0.0106536	-0.0224239	-0.192331	-0.0274816
Super	-0.129993	-0.0701393	0.229516	-0.019314	0.146892	-0.0299347	-0.0964716	0.0490876	0.193019	0.0934611	0.0192149	0.00182824	0.093237	-0.00489839	0.207814	-0.173009	0.115079	0.153653	0.0105435	-0.114369	-0.0339603	0.230946	0.0325778	0.287542	0.117139	0.0624553	0.0799969	-0.0314055	0.21964	0.18572	-0.224362	0.0422926	-0.451239	-0.0276409	0.0283683	-0.0755185	0.192039	1	0.504545	0.209531	-0.0932515	-0.149009	0.0389923	-0.0932515	-0.144176	-0.121134	0.0934611	-0.235428	0.0274816
Mirr	0.23721	-0.137687	-0.236878	-0.0578942	0.149618	0.0107702	-0.119549	0.0419469	0.0797836	-0.0152828	0.0717317	-0.76456	-0.296574	0.145529	-0.302009	0.11328	-0.232252	-0.146583	-0.931075	-0.17972	0.104966	0.11143	0.301529	0.24619	-0.0788402	-0.0850737	0.187323	0.131688	0.251399	0.343642	-0.0289532	-0.179724	-0.931075	-0.0951751	0.00631182	0.171771	0.259357	0.504545	1	0.269733	-0.0346194	0.0143697	0.134423	-0.0346194	0.0617834	-0.0706936	-0.944404	-0.864258	0.174218
X8mm	0.0756367	-0.036357	-0.0770824	0.0577305	0.140578	0.00914241	0.0470895	0.0456982	-0.376419	0.0840774	0.386022	0.189494	0.0115545	-0.0172492	-0.234351	0.132001	-0.145764	-0.195811	-0.298173	-0.102549	-0.202436	0.21653	-0.0285599	0.219603	0.319444	-0.172647	-0.166717	0.104584	-0.0901452	0.0789188	0.143053	0.206382	-0.0149848	0.0354467	0.0919416	0.294068	0.383237	0.209531	0.269733	1	0.0746407	0.0391695	-0.0102208	0.124528	0.156955	0.0244921	-0.106536	-0.132228	-0.0512426
Make	-0.0321543	0.100823	-0.0393739	-0.0532035	0.240405	-0.124439	-0.0465742	0.0971246	-0.293736	-0.0518324	0.107793	-0.159885	0.124264	0.0677367	-0.130295	0.187417	-0.0658516	-0.0920698	-0.125548	0.0410995	0.00908863	0.0814676	0.20463	0.00381392	-0.0293646	0.104904	0.197816	-0.0729653	-0.23472	0.165552	-0.068099	0.0047096	-0.125548	0.134144	-0.0483036	-0.117732	-0.0318226	-0.0932515	-0.0346194	0.0746407	1	0.484833	0.340998	-0.277918	0.332195	0.107634	-0.224206	0.0319425	0.0530654
Cross	-0.098472	0.313345	-0.221393	0.0689234	-0.0764922	0.226904	0.312138	1.2335e-08	-0.208034	-0.897096	0.0920883	0.062899	0.012965	-0.108537	-0.286621	0.130867	-0.213611	0.0541337	0.130867	-0.844545	0.125095	0.0777527	-0.144571	-0.105699	-0.131803	-0.447551	0.201715	0.146399	0.0260082	0.114189	-0.939077	0.402852	-0.916839	0.225849	-0.181134	-0.0469638	0.0665115	-0.149009	0.0143697	0.0391695	0.484833	1	0.242267	-0.194094	0.329042	0.130301	0.343497	0.289276	0.0220577
TopL	0.0371533	0.104408	-0.13901	-0.167874	0.105674	-0.0547145	-0.152336	0.0155469	0.0220239	-0.231839	0.0081517	-0.263511	-0.333322	0.125582	-0.0583448	0.454794	0.0350381	-0.134625	0.175767	-0.135684	-0.0745973	0.0982176	0.0951319	0.118478	0.218021	0.112803	0.475653	-0.0160864	0.131186	0.325187	-0.250583	-0.0257746	-0.230632	0.0167521	-0.161497	0.0371526	0.186759	0.0389923	0.134423	-0.0102208	0.340998	0.242267	1	-0.240205	0.0361693	0.4691	-0.0508342	-0.00536565	0.147158
Bowl	0.391596	-0.0807626	-0.93469	0.162577	0.0694509	0.168197	0.132074	0.137578	0.117914	-0.224206	0.0415655	0.2749	0.45278	-0.328338	0.000183684	-0.0038108	-0.180954	0.0881345	-0.0038108	-0.0410516	0.0822888	0	-0.0570128	0.168686	-0.0293646	-0.180574	0.355742	-0.930068	0.127312	-0.0207702	0.0594638	-0.0532035	-0.286865	0.134144	0.0348399	0.323648	0.00950061	-0.0932515	-0.0346194	0.124528	-0.277918	-0.194094	-0.240205	1	-0.0855601	-0.370557	-0.86034	-0.308846	-0.0523699
Spiky	0.216631	-0.0862614	-0.241137	-0.0462673	0.264446	-0.00914734	-0.12641	-0.136676	-0.00682231	0.0378648	0.120489	0.0473388	-0.0494482	-0.086453	-0.33861	0.148505	-0.170976	-0.16844	-0.233712	0.020782	-0.188324	0.0135948	-0.0244678	-0.075053	0.0509579	-0.0894956	-0.00473516	0.0633805	0.328638	0.00239328	0.241546	0.172852	-0.338037	0.054862	-0.0438728	-0.185027	-0.0227239	-0.144176	0.0617834	0.156955	0.332195	0.329042	0.0361693	-0.0855601	1	0.139726	-0.149723	0.107554	0.128448
Bald	-0.0654159	-0.0692706	0.137593	-0.143841	-0.0736379	-0.15532	-0.0758149	-0.0638279	-0.159223	-0.903448	-0.120264	-0.224196	-0.147677	0.169897	0.0036234	0.225129	0.0748814	-0.146881	-0.106673	-0.0837655	0.0288538	0.115925	0.0600065	0.0855539	-0.038906	0.0884274	0.114175	-0.116465	0.137993	0.195288	-0.0279282	0.143035	0.10202	0.217199	-0.238908	0.178567	-0.0106536	-0.121134	-0.0706936	0.0244921	0.107634	0.130301	0.4691	-0.370557	0.139726	1	0.294285	0.295942	0.391919
Butch	-0.131172	-0.993884	0.327474	-0.0776103	-0.122716	-0.173736	-0.141972	-0.213759	0.0606912	-0.0297279	-0.0751722	-0.801161	-0.311063	0.196247	0.161363	0.0966779	0.213422	-0.161203	-0.092191	0.221885	-0.0437058	0.0708625	-0.0772287	0.208557	0.040515	-0.0487314	0.173673	0.332125	0.122638	0.160819	-0.0434287	0.345811	-0.944171	-0.139117	0.0364013	0.0446574	-0.0224239	0.0934611	-0.944404	-0.106536	-0.224206	0.343497	-0.0508342	-0.86034	-0.149723	0.294285	1	0.753282	0.29725
Pixie	-0.165448	-0.11462	0.278787	-0.0403767	-0.436269	-0.128479	-0.0994005	-0.0144598	-0.223038	0.0446574	0.12707	-0.187199	-0.0958283	0.23428	0.122385	-0.313946	0.296168	-0.0321639	0.0630594	0.143688	-0.300674	-0.152222	-0.109782	-0.0589098	-0.053095	-0.0611179	0.169106	-0.10016	0.0881679	0.0361027	0.131609	0.0131519	0.0630594	0.012108	-0.019404	-0.07803	-0.192331	-0.235428	-0.864258	-0.132228	0.0319425	0.289276	-0.00536565	-0.308846	0.107554	0.295942	0.753282	1	0.459569
Crop	0.0274787	-0.285223	0.143973	-0.262606	-0.0502783	-0.210195	-0.0474658	-0.107814	-0.0757842	0.0663324	-0.0870602	-0.162214	-0.299402	0.225169	0.101914	-0.11552	0.25189	-0.13874	-0.0332428	-0.0601215	-0.0971235	-0.0846974	-0.0232753	0.124964	-0.208175	-0.0734882	0.439573	0.212924	0.0683285	0.07655	-0.141822	0.0324315	-0.11552	0.00427316	-0.104969	0.0523223	-0.0274816	0.0274816	0.174218	-0.0512426	0.0530654	0.0220577	0.147158	-0.0523699	0.128448	0.391919	0.29725	0.459569	1
Tank	-0.119849	-0.0749915	0.211844	-0.189497	-0.052344	-0.118071	0.059625	-0.0748622	-0.273312	-0.194803	-0.030909	-0.105553	-0.434195	0.277913	0.108826	0.0307338	0.160307	-0.0902209	-0.112013	-0.146082	-0.0263004	0.0512814	0.0700592	0.127013	-0.182268	-0.00339943	-0.0456976	-0.12093	0.131771	0.293003	-0.322162	0.201174	-0.19116	0.138904	-0.0739251	0.00186233	-0.025506	-0.0266638	0.0138119	-0.122592	0.145564	0.205394	0.124121	-0.0896883	0.19118	0.338812	0.289078	0.433902	0.71616
Lace	-0.00543819	-0.970429	0.193789	-0.0368682	-0.176868	-0.0998966	0.0798911	0.0779549	-0.0319673	-8.4359e-09	0.0920883	-0.79134	0.120397	-0.108537	0.294247	0.130867	0.0109261	-0.131084	0.130867	-0.16421	-0.00826087	0.156588	0.0135407	0.211834	-0.131803	0.275666	0.201715	-0.757376	0	-0.141053	-0.939077	0.0689234	-0.916839	0.127901	-0.104311	-0.0469638	-0.0910956	0.168652	-0.854715	0.0391695	-0.016336	0.0295657	-0.0908384	-0.194094	-0.381774	0.0449786	-8.4359e-09	0.193789	0.281072
Leath	-0.171258	0.0408807	0.203506	-0.068749	-0.0651824	0.0417583	-0.131223	0.289128	-0.0730393	0.0314509	0.222609	-0.0788628	-0.0627634	-0.0186176	-0.076209	-0.163835	-0.154906	0.444779	-0.228493	-0.0581219	-0.0231388	0.0111319	0.107836	-0.0572774	0.0910047	0.06438	-0.0508071	-0.4375	-0.230601	0.145606	-0.0688456	0.116206	-0.0399106	0.0284711	-0.0360062	0.0522805	0.0379933	0.119991	0.0641888	0.0497951	0.283988	0.0219293	0.129056	-0.125081	-0.0744255	0.129599	0.102503	0.350394	0.292202
Flan	-0.197505	0.103978	0.18696	-0.029403	0.00426229	-0.0967655	-0.104417	-0.0409211	0.260095	0.0143636	0.0282231	0.212606	-0.133425	-0.0297373	-0.274251	0.0307457	-0.0549307	0.0162972	-0.1852	0.0401884	-0.906787	-0.071623	-0.0838236	0.0351977	0.1085	-0.13429	-0.0663767	-0.975943	-0.189194	0.00686048	-0.29034	0.0205811	-0.0680643	-0.0519596	0.231507	0.0180414	0.325251	0.0128843	-0.262041	0.0748398	-0.151554	-0.0752842	0.0645615	0.178077	-0.0297373	-0.0401689	0.119738	0.0774958	0.0518479
Torn	0.223212	-0.215188	-0.156584	-0.413625	0.250341	0.0399106	-0.320298	0.0553298	-0.859463	0.0966779	0.239301	-0.985129	0.150171	-0.0624792	-0.230722	0.157887	-0.0451054	0.350754	0.157887	-0.0915263	-0.117349	-0.206606	0.0534883	-0.0631326	0.204754	-0.0808239	-0.777939	-0.767832	-0.249217	-0.0889158	-0.105989	0.231304	0	-0.192621	-0.200036	-0.313946	0.110473	0.0105435	-0.0776305	-0.190719	0.187417	-0.0622109	0.234303	-0.125548	0.0823962	0.0362971	0.234591	0.151275	0.179145
Dark	-0.0264447	-0.227944	0.278368	-0.148669	-0.0321349	-0.136869	-0.00590518	0.202031	-0.0295854	0.117881	-0.0786659	-0.0929087	0.0263597	0.0866503	0.0909974	-0.109959	0.0191913	0.0731187	-0.327479	0.0400155	-0.0624101	0.0882779	0.210315	0.0161993	0.0516573	0.116248	0.932126	-0.444432	-0.338631	-0.0196724	0.0111519	0.0395025	0.192029	0.038405	-0.131148	0.0541093	-0.00261938	0.00261938	-0.311388	0.0776137	-0.0512028	-0.336503	0.02754	-0.0512028	0.183275	0.233731	-0.00712129	0.121885	-0.0406947
Baggy	-0.274063	0.0713318	0.311058	-0.216676	-0.219984	-0.182448	-0.0798358	-0.310903	-0.0757842	-0.123137	-0.199912	-0.326287	-0.246415	0.375428	0.141119	-0.0332428	0.25189	-0.00520694	-0.0332428	0.207956	0.0661087	0	-0.167367	0.0675406	-0.0902109	-0.0452497	-0.180541	-0.239708	-0.0470443	0.239744	-0.0437574	0.14437	0.0423238	-0.0263728	-0.0192257	-0.0459522	0.0878464	-0.146031	-0.222192	-0.212734	-0.0523699	-0.0821048	0.0861908	-0.300113	0.16124	0.21885	0.431067	0.271021	0.362126
Nice	0.165999	-0.278137	0.0199855	0.152744	0.231133	0.236494	0.0657189	0.24158	0.360063	0.152303	0.0113219	0.941352	-0.0554087	-0.35595	-0.115404	-0.0842513	-0.327121	0.12328	-0.190067	-0.141674	-0.382909	0.0246734	-0.00913218	0.12474	-0.100644	0.0300687	0.770424	0.00178454	-0.30137	-0.0310433	-0.0131558	0.471282	0.215188	0.306575	0.0955485	0.0199855	-0.0701393	0.0193867	-0.292731	0.106919	-0.0158119	0.122194	-0.104408	0.195516	0.22937	0.0692706	0.152303	-0.139423	0.125666
LA	-0.142271	0.00707334	0.187302	-0.11499	0.0646005	0.0042079	-0.161021	0.0509866	0.0165806	-0.267199	0.164435	0.022018	0.0466315	0.0922813	0.137579	0.0733766	0.0355447	0.0917586	-0.121027	0.0674391	0.231889	0.0474775	0.0191186	-0.011133	0.0607828	-0.136283	-0.301023	0.0718877	0.0373758	0.114217	-0.285921	0.209454	-0.192059	0.0349194	-0.0524633	0.0291438	0.0933029	0.00352151	0.242826	0.0276893	0.254271	0.046256	-0.0978713	0.0469	0.149353	-0.217199	-0.0893323	0.0291438	0.204067
Cow	0.0400105	-0.152303	0.0446574	0.114932	0.193654	0.1924	-0.141972	0.150853	0.167683	0.166693	0.0525943	-0.801161	-0.0273727	-0.264244	-0.316488	0.234591	-0.249587	-0.161203	-0.944171	-0.0181455	0.193873	0	0.070411	0.067974	0.111589	-0.261102	-0.746358	0.117751	-0.849926	-0.0807527	-0.0434287	0.274165	-0.092191	-0.139117	0.188093	-0.0826341	0.200978	-0.281865	-0.0152828	0.0840774	0.0774	0.199996	0.0295822	-0.0518324	-0.0509514	-0.00524294	-0.991236	0.0446574	0.148695
Nerd	-0.107186	0.0131558	0.131609	-0.0961738	0.0945055	-0.137089	0.073944	0.0469943	0.0426678	-0.898648	-0.0914901	0.0200038	-0.045779	0.171309	-0.330165	0.0809453	0.113018	-0.175041	0.0809453	0.20298	-0.0599523	0.0339369	-0.0474616	-0.0322598	-0.0597708	-0.0832118	0.536753	0.104502	-0.200231	0.181546	-0.911788	0.24968	0.217741	-0.109941	0.211457	0.131609	-0.0606483	-0.38727	-0.988599	0.0619811	0.0594638	0.327682	-0.158281	0.340793	-0.168492	-0.113725	-0.0434287	0.0265537	-0.0437574
Nat	0.0234057	0.0408807	-0.0643364	0.0858015	-0.0908035	0.0417583	0.142658	0.00140881	0.0872305	-0.0408979	-0.295651	-0.0788628	0.0722381	0.00914734	0.0904589	-0.228493	0.128898	-0.130312	-0.163835	-0.0581219	-0.0659194	0.144232	-0.100933	0.0582154	0.0456311	-0.245729	0.0877155	-0.0234064	0.0968916	0.0470161	-0.0688456	-0.0375274	-0.0399106	0.0770938	-0.171205	-0.0251387	0.218396	0.317164	0.138171	0.0203958	0.00144277	-0.226904	0.178037	-0.0824629	-0.0744255	-0.0801315	-0.0408979	-0.103883	-0.0164355
Urban	0.101753	-0.0550771	-0.0983199	0.0309374	-0.186144	0.0550485	0.101498	0.145941	-0.27782	-0.0364013	-0.00329523	-0.0746255	0.111577	-0.123687	-0.138318	-0.291655	-0.119363	0.121258	-0.159228	-0.00750689	0.149431	-0.111304	-0.33387	-0.0250981	0.168062	-0.0578224	0.227126	-0.0193938	-0.380168	-0.0835653	-0.136781	0.212648	0.142278	0.263686	-7.79664e-09	0.0962114	0.141732	-0.0283683	-0.163447	0.143759	-0.16292	0.181134	0.0125592	0.0892953	-0.0674718	0.162756	0.0359781	-0.0194878	0.0765376
Water	-0.0993823	0.0179584	0.121844	0.0330975	-0.0550827	0.0816471	0.0445308	2.16846e-09	-0.0583176	3.08944e-08	0.0140946	-0.0646932	-0.124083	0.0493639	-0.0605272	-0.342337	0.139239	-0.166388	0.0837114	-0.168549	-0.158011	0	-0.196358	0.0823527	-0.0901976	-0.0640065	0.187491	0.194899	-0.0499807	0.205346	-0.186166	-0.206986	-0.342337	0.0698739	-0.121455	0.0413496	-2.51566e-09	0.239255	0.0268277	0.0732699	0.185434	-0.0286759	0.235348	-0.0300051	0.107625	-0.0857872	0.148991	0.0819525	0.0715032
Indus	0.344546	-0.309049	-0.26576	-0.124933	0.240954	0.0398628	-0.127174	0.115478	0.107298	-0.00919231	0.165594	-0.122079	0.0684848	-0.140523	-0.0754339	0.0425071	-0.339261	-0.0449247	0.0425071	-0.200617	-0.114972	0.112495	0.231736	-0.0923574	-0.0293769	0.147815	-0.826897	-0.0354339	0.104917	0.204131	0.104967	-0.0562589	-0.0824699	0.011245	0.225682	-0.158078	0.0968332	-0.143972	-0.171773	-0.157575	0.25947	0.161187	-0.0678639	-0.0303378	0.283732	0.185838	-0.849926	-0.158078	-0.420945
Car	0.0460713	-0.165256	0.0562443	0.0641924	-0.0656704	-0.1623	0.0420464	0.123885	-0.300664	0.0447514	-0.108811	0.0738413	0.0110156	0.0293312	-0.000389806	-0.302118	-0.0690904	0.203691	-0.400763	-0.174349	-0.106697	-0.0374252	-0.190851	0.0737693	-0.0242624	0.0295273	0.0874168	0.120636	-0.104729	0.159199	-0.143699	0.0301744	0.00696358	0.496356	-0.019114	0.0562443	0.284433	0.220761	0.224043	0.262225	-0.119701	0.0147088	-0.00527611	0.0240927	-0.0645206	0.241516	-0.0359362	-0.0749688	0.170561
NoBand	-0.346078	0.530769	-0.0393739	0.162577	-0.119701	-0.0427981	0.174307	-0.194347	-0.958706	-0.0518324	-0.946663	-0.84455	-0.375888	0.2059	0.0596946	-0.286865	0.0885068	-0.874646	0.266959	0.115586	-0.162652	-0.0407257	-0.179876	-0.0386856	-0.071616	-0.0997912	-0.0143614	-0.0729653	0.197859	-0.0647209	-0.863726	-0.114549	0.266959	0.134144	-0.210177	0.0319425	0.00950061	0.113487	-0.0346194	-0.0885622	0.0717475	0.227011	0.00572729	-0.171759	-0.199445	0.107634	-0.224206	-0.2056	-0.0523699
Dream	-0.0373875	0.322801	-0.97492	-0.226703	-0.0394664	0.0674336	0.1686	0.0198558	-0.111634	-0.755418	-0.969414	0.155229	0.144608	0.146423	-0.190405	0.0328851	0.269794	-0.892999	0.0328851	0.130261	0.105672	0.0524866	-0.288729	-0.034701	-0.173654	-0.310517	0.514752	-0.718782	0.138852	-0.150638	-0.769711	-0.0439389	-0.802252	0.383902	-0.252883	0.0680414	-0.136737	-0.0755159	0.107957	-0.250736	0.243256	0.336332	0.275832	0.243256	0.0272505	-0.147577	0.0939142	-0.12498	0.0529342
Dance	-0.54319	0.272086	0.536665	-0.261484	-0.428233	-0.236014	-0.127496	-0.179081	-0.194582	-0.982566	-0.156647	-0.250668	-0.105162	0.59188	0.213044	-0.216099	0.529671	-0.314421	-0.0651523	0.266836	0.129085	-0.0872589	0.039981	0.0481216	-0.127168	-0.145075	0.356504	-0.142784	0.0521868	0.0469246	-0.0587876	0.195372	-0.0651523	-0.0646005	0.0575632	0.0979949	-0.121999	-0.00396628	0.295999	-0.123359	0.1137	0.0996822	0.0227811	-0.0224661	-0.0645206	0.130936	0.12105	0.294044	0.550496
Silly	-0.0361287	0.061823	0.00305735	0.0146771	-0.190137	0.197034	0.121923	-0.0512678	0.19601	-0.142797	0.267438	0.330748	0.154828	-0.0859095	0.117785	-0.172908	-0.00816857	0.302016	-0.0362167	0.128323	-0.0591009	-0.264653	-0.287665	-0.0557427	-0.18314	-0.334999	0.185055	-0.0836107	0.182323	-0.118189	0.147258	0.223869	-0.0362167	-0.268175	0.203862	0.00305735	-0.0419697	-0.0435124	0.00695834	-0.0158258	0.00546064	0.882297	-0.337633	-0.0460243	0.162912	-0.268315	0.0288627	0.159216	0.328526
Srs	0.00986339	-0.042827	0.0186439	-0.0714339	0.161026	-0.123887	-0.0603637	-0.025481	-0.307149	0.0781029	-0.186932	-0.151981	-0.0860387	0.11381	-0.241262	0.191795	0.0347668	-0.28556	0.125565	-0.247542	-0.0264623	0.22886	0.19665	0.00310461	0.137397	0.274748	-0.171373	0.0992661	-0.236637	0.188098	-0.130784	-0.24832	-0.0211353	0.275222	-0.243736	0.0186439	0.123229	0.11043	-0.0923095	0.0785081	0.165139	-0.350973	0.370626	-0.0385935	-0.216426	0.29903	0.0781029	-0.0316927	-0.26333
Agg	0.182185	-0.300961	-0.0553938	0.0210838	0.473905	0.0208977	-0.290493	0.0922947	0.311043	0.33575	0.0353773	-0.11393	-0.221554	-0.265392	-0.141479	0.635785	-0.421592	0.229087	-0.241077	-0.0763102	-0.217242	0.277637	0.165038	0.114518	-0.0104755	0.0825175	-0.805977	0.176673	0.116298	0.248572	-0.851183	0.0210838	-0.241077	-0.0548316	-0.123466	-0.0553938	0.1266	0.0155523	0.0170429	0.0464718	0.139391	-0.148103	0.331002	0.0639243	0.10385	0.154704	-5.01916e-09	-0.256404	0.0261468
Alc	-0.0815175	0.100823	0.0319425	0.112266	-0.170734	-0.164759	0.0889281	0.0971246	-0.188947	-0.224206	-0.0301106	0.161281	0.068015	0.11527	0.000183684	-0.0038108	0.0390547	-0.0920698	0.0980318	0.18386	-0.0715331	0.0407257	0.0707569	0.00381392	-0.071616	0.0224715	0.197816	-0.0729653	-0.379767	-0.0647209	0.165734	0.0597373	-0.0038108	0.182146	0.077047	0.0319425	-0.233758	-0.0932515	0.0963913	0.0226904	-0.0811944	-0.852949	-0.240205	0.0717475	-0.261356	0.107634	-0.0518324	0.217267	0.241411
Relig	0.0552888	-0.106427	0.00140334	-0.146015	-0.0171259	0.0886825	-0.0418555	0.0414476	0.0865987	-0.0751722	0.011111	0.00106114	0.0344576	-0.120478	0.231874	0.0715317	0.142	-0.117776	0.160025	-0.407618	-0.0991668	0.174105	-0.0479655	-0.0848156	0.0807895	-0.156741	0.176081	0.253505	0.0237053	0.110442	-0.0914901	0.0243865	-0.861513	0.21936	-0.190354	-0.145753	0.0201102	0.173649	-0.0578977	0.0866398	0.0415655	0.0920883	0.364579	-0.197365	0.0289816	0.109184	-0.0751722	0.00140334	0.0158949
Cap	-0.0855859	0.0926376	0.0450269	-0.122536	0.00301224	-0.0152191	0.148021	0.0478647	-0.106658	-0.0531675	-0.331405	0.0339313	-0.105707	0.0314644	-0.0634679	0.0436921	-0.108777	0.0115578	-0.248526	-0.039797	-0.391421	-0.0316214	-0.111111	0.0336023	-0.0370191	-0.0677458	0.0823265	0.00906577	-0.174243	0.123842	-0.190786	0.217471	-0.13657	0.33112	-0.0536171	0.0450269	0.127172	0.0983539	0.164012	0.0150895	-0.152282	0.188696	-0.0178847	0.194722	-0.0887269	0.187231	0.140947	-0.126816	-0.00912495
Circ	0.277875	-0.974854	-0.12498	-0.0439389	0.078515	0.181511	-0.0574003	0.0198558	-0.111634	-0.755418	0.0752713	-0.752517	0.144608	0.0272505	-0.856559	0.0328851	-0.0958653	-0.892999	0.0328851	-0.0679828	0.251303	-0.0524866	0.270563	-0.149806	0.25684	0.00841988	0.514752	-0.718782	0.138852	-0.0422532	0.0805702	0.0966923	0.0328851	0.087832	-0.148922	-0.12498	0.0755159	0.136737	0.107957	0.0689259	0.243256	0.485888	0.474845	-0.951608	0.355228	0.511451	-0.755418	0.0680414	0.17246
Pol	-0.0339402	0.0550738	0.00319125	-0.136608	-0.118755	0.0128085	0.0126386	-0.129838	-0.40107	-0.0181455	0.0858033	-0.9775	0.116893	-0.0343692	-0.164024	-0.0915263	-0.0731217	0.0431253	-0.257137	-0.358305	-0.0314657	0	-0.217152	-0.108928	0.042662	0.0310699	0.386699	-0.901982	-0.350597	0.163157	0.20298	0.16536	0.136285	0.289372	-0.0816989	0.265106	0.255464	-0.114369	-0.00103784	0.128606	0.115586	0.0171225	0.160108	0.0410995	-0.0343692	0.259967	0.113147	0.00319125	0.158698
Finst	0.194292	-0.309049	-0.0664952	0.0680797	0.101296	-0.00620806	-0.0216696	0.248296	0.175466	0.122638	0.0237053	0.319296	0.0056515	-0.206012	-0.00492845	0.317338	-0.18834	-0.0449247	-0.865767	0.170513	0.208944	0.157634	-0.0131617	0.0487134	0.15211	-0.123918	0.022815	0.317552	-0.0766074	-0.0544318	0.212869	0.0680797	0.0425071	0.011245	0.08131	0.0145628	0.0502971	-0.290168	0.00788411	0.0324804	0.0523495	0.0260082	-0.17747	0.0523495	-0.0205969	-0.250661	0.408941	0.155917	0.0683285
X2Col	-0.35819	-0.0310433	0.491357	-0.23673	-0.419192	-0.266164	-0.054685	-0.353105	-0.0973534	-0.160819	-0.20271	-0.284099	-0.235554	0.557317	0.123672	-0.0383637	0.421148	-0.0481687	-0.177671	0.347172	0.0804446	-0.155729	-0.0595694	0.0180864	-0.00624292	-0.0513245	0.323957	-0.176323	-0.0443833	0.0622376	-0.098148	0.260914	0.0264729	0.248078	-0.179974	0.128043	0.0875702	-0.136671	0.184538	-0.111836	-0.0241356	0.141053	0.318427	-0.320905	0.115361	0.521307	0.359355	0.388878	0.542375
Wfem	0.218832	-0.366679	-0.0686834	0.218631	-0.108811	0.0486186	0.246398	0.00244602	-0.214803	0.159309	-0.0593583	0.137195	-0.0859127	-0.174445	0.183838	0.0715317	0.0967721	-0.117776	0.0715317	-0.0685208	-0.0198942	0.251669	0.115141	-0.0438999	0.0417389	-0.118401	-0.0348017	0.105036	-0.149819	-0.020168	0.231934	-0.20991	0.0715317	0.0403975	0.00329523	0.00140334	-0.058243	0.0192149	-0.86245	-0.0130821	-0.301375	0.0920883	-0.223121	-0.108886	-0.174445	-0.398092	0.159309	0.238327	0.0644571
Bfem	-0.620742	-0.166141	0.727873	-0.213652	-0.47913	-0.548422	-0.0786968	-0.60609	-0.0838589	-0.898648	-0.869284	-0.838406	-0.32475	0.667726	0.296937	-0.105989	0.680721	-0.175041	0.217741	0.453132	0.349951	-0.0339369	0.0229802	-0.0322598	-0.13227	0.0530208	0.160685	-0.782198	-0.200231	-0.19311	-0.911788	0.00392283	0.0809453	-0.0390319	-0.275334	-0.265248	-0.262202	0.0606483	-0.988599	-0.240716	-0.238021	-0.939077	-0.250583	-0.238021	-0.424317	0.12637	0.654332	0.381028	0.199929
Bmal	-0.435012	0.211582	0.404546	-0.330335	-0.288868	-0.411077	-0.171295	-0.337123	-0.35114	-0.986872	-0.208497	-0.933007	-0.283663	0.555314	0.194072	-0.206011	0.441177	-0.112698	-0.854277	0.369034	0.123738	0	0.0421602	0.000729793	-0.029659	0.150859	-0.790628	0.00724631	0.165455	0.0132203	-0.156958	0.0788796	-0.0331156	0.206781	-0.119014	-0.102877	-0.203999	-0.265961	-0.128512	-0.485411	0.113941	-0.962705	0.276442	-0.18488	-0.220199	0.375656	0.0394944	0.287512	0.0875046
Gay	0.0981145	-0.122194	-0.0469638	-0.0368682	0.0996822	0.0577957	0.160575	0.0779549	-0.208034	-8.4359e-09	0.38281	0.062899	-0.11427	-0.108537	-0.85824	-0.0622109	0.0109261	0.190758	-0.0622109	-0.16421	-0.186888	0	-0.0665332	-0.022494	-0.131803	-0.202625	0.424405	0.362612	-0.156264	0.212785	-0.939077	0.0689234	-0.916839	0.0380359	-0.181134	0.289276	0.0665115	0.0910956	0.360154	0.218596	0.322651	0.668482	0.38976	-0.194094	0.17327	0.0449786	0.343497	0.289276	0.201113
Efem	-0.098472	0.201178	-0.0469638	-0.161141	-0.0764922	0.0577957	-0.0955622	0.155465	-0.208034	-0.897096	0.38281	0.062899	0.012965	-0.00538984	-0.286621	-0.0622109	-0.213611	0.0541337	0.130867	0.0171225	-0.00826087	-0.156588	0.0968966	-0.022494	0.0307628	-0.0475081	0.201715	-0.757376	0.0260082	-0.0605279	0.184855	0.0689234	-0.0622109	-0.046256	-0.181134	-0.221393	-0.244912	-0.235136	0.0143697	0.132855	0.555012	0.587932	0.16553	-0.852949	0.253132	0.210556	-8.4359e-09	0.193789	-0.359999
Gaze	0.00347623	0.147873	-0.13829	-0.163858	0.264828	-0.0839693	-0.222824	0.0195485	-0.119246	-0.85936	-0.0613627	-0.230197	-0.100793	0.0662907	-0.053678	-0.089774	-0.0861349	-0.285432	-0.876231	-0.0562137	0.162427	0.0515621	0.21766	0.0275305	-0.151922	0.160978	0.12346	0.198282	-0.123224	-0.0314855	-0.147532	-0.0591232	-0.20534	0.02533	-0.0204595	-0.00877978	-0.0720115	0.00254875	0.212234	-0.313095	0.479334	0.236254	0.209727	-0.0993879	-0.107338	0.27202	0.0975911	0.105518	0.369629
Narr	0.0880931	-0.0876202	-0.0553358	-0.171557	0.0761051	-0.0589853	0.0466447	-0.0946789	-0.282574	0.0119825	-0.0444242	-0.00163721	0.0359187	0.0829294	-0.112004	0.151789	0.245353	-0.177418	-0.173273	-0.0824234	0.0571041	0.178229	-0.0032337	-0.296634	-0.299861	0.139075	0.343296	0.120865	0.0535879	-0.0823701	-0.224662	0.160584	0.080332	0.27398	-0.299906	-0.170014	-0.280845	-0.0754365	-0.190709	-0.210479	0.0969488	0.0568234	0.0539361	-0.128489	-0.0647181	0.250662	0.0119825	0.190216	0.160553
Perf	0.136549	-0.37509	0.0626919	0.0374906	-0.0282022	0.209507	-0.236013	0.306642	0.215196	0.198793	0.316021	-0.0180625	0.163598	-0.254437	-0.069853	-0.0598751	-0.229928	0.439079	0.00886447	-0.0594573	0.178942	-0.27342	0.109287	-0.230239	0.088507	-0.132451	-0.861404	-0.875073	-0.155471	-0.205061	0.368508	-0.0322013	0.421667	-0.331183	0.202273	-0.162381	0.0954837	0.0323672	-0.19371	-0.0473997	-0.27386	-0.902251	-0.169395	0.246676	-0.0250768	-0.0959003	-0.462295	-0.162381	-0.321127
Coll	-0.0728793	-0.0977017	0.187814	0.0389923	0.022689	-0.0643731	0.114126	-0.13204	0.018076	0.0104478	-0.102545	-0.356398	-0.227097	-0.00687257	0.206712	-0.0963997	-0.00226907	-0.132927	0.112013	0.0356451	-0.0225269	0.204213	0.116336	0.329353	0.155662	0.182157	-0.377498	-0.0201561	0.132805	0.137295	-0.325251	-0.0673078	-0.27764	0.112745	-0.00437154	0.13809	-0.0266638	0.131636	0.0757316	0.0518939	-0.00862056	0.051944	-0.0108221	-0.18883	0.0252031	0.00189627	0.194803	0.0434241	0.149259
Movie	0.931692	-0.752783	-0.773245	0.228483	0.107746	0.874508	-0.143532	-0.0387747	-0.761605	-0.70508	0.0936097	-0.682034	0.0290997	-0.939082	0.264887	-0.728633	-0.927896	-0.756601	0.236773	-0.771822	0.120311	-0.101996	-0.429067	0.00802074	-0.0137479	0.0635036	-0.825895	0.655526	0.149354	-0.075879	0.281168	-0.0118713	-0.728633	-0.0642396	0.245982	0.0872439	-0.175413	0.175413	0.306377	0.204075	-0.787678	-0.694163	0.0956435	0.113435	-0.939082	0.132578	-0.70508	-0.773245	-0.0492804
Sat	0.0114258	0.0572372	-0.0650328	0.0587258	-0.171722	0.0284033	0.181313	0.00348279	-0.322029	-0.962907	-0.328704	0.288338	0.371127	-0.0233593	-0.888084	0.000513403	-0.0785118	-0.245579	-0.176538	0.107147	0.077822	-0.0826687	-0.132634	-0.295023	-0.0186569	-0.244485	0.698902	0.0361263	-0.270674	0.0774719	0.396965	0.193276	0.000513403	0.22601	0.0235361	-0.0650328	0.0381041	-0.153361	0.227151	0.0258075	0.234799	0.538654	0.011589	0.0685046	0.108865	-0.0690768	0.0725676	0.119717	0.0754824
[truncated: 40 more columns]
